# Supplementary material for: Domestication reshaped the genetic basis of inbreeding depression in a maize landrace compared to its wild relative, teosinte
Source: PLoS Genet. 2021 Dec 20;17(12):e1009797. doi: 10.1371/journal.pgen.1009797 (PMC8722731; doi:10.1371/journal.pgen.1009797)
Supplement: S9 Table — Filtered version of S7 Table including only overlapping haplotype QTL positions with effects on more than one trait in teosinte. (XLSX) [file pgen.1009797.s033.xlsx]

## Sheet: Table_S9_Pleiotropic_rare_allel
Trait	marker	Hap	LOD	Parent	Pos_end	Pos_start	SNP	SNP_end	SNP_start	a	cM	cM_end	cM_start	chrom	d	p_value_add	p_value_d	pos_Agpv4	r2_A	r2_D	r2_AD	a_effect	a_pval	a_tval	d_effect	d_pval	d_tval	N_het	N_hom	Gr_Trait	orden
CUPR	S1_4601740_PC_K55_ID2hap2	2	6.08156	PC_K55_ID2	5614669	4499940	S1_4601740	S1_5542479	S1_4358844	-1.35433	10	15	9	1	1.34944	1.70286e-07	2.79139e-07	4719570	0.00284579	0.00289003	0.00293138	-1.20736	5.25101e-07	-5.02459	1.22568	4.28947e-07	5.0635	85	1	Reprod	12
GE	S1_4601740_PC_K55_ID2hap2	2	6.08156	PC_K55_ID2	5614669	4499940	S1_4601740	S1_5542479	S1_4358844	-2.70866	10	15	9	1	2.69887	1.70286e-07	2.79139e-07	4719570	0.00284579	0.00289003	0.00293138	-2.41473	5.25101e-07	-5.02459	2.45136	4.28947e-07	5.0635	85	1	Reprod	14
PLHT	S1_4772159_PC_K55_ID2hap2	2	5.02947	PC_K55_ID2	5614669	4499940	S1_4772159	S1_5542479	S1_4358844	-46.7095	11	15	9	1	40.1011	9.19604e-06	0.000177475	4914637	0.00312953	0.00239653	0.00339445	-47.8343	6.43666e-07	-4.98514	42.5383	1.31649e-05	4.36244	82	1	Veg/Flo	3
EL	S1_5092078_PC_K55_ID2hap2	2	4.56653	PC_K55_ID2	5614669	2935269	S1_5092078	S1_5542479	S1_2842597	-11.6196	13	15	3	1	10.1055	1.81226e-05	0.00023619	5207701	0.00256683	0.00190001	0.00286873	-11.8503	1.48204e-06	-4.82047	10.342	3.42918e-05	4.14733	84	1	Reprod	11
ED	S1_10538299_PC_K54_ID1hap2	2	4.81109	PC_K54_ID1	14365510	1834406	S1_10538299	S1_14170021	S1_1780412	-0.154802	28	34	1	1	0.305872	0.0209066	1.28475e-05	10622557	0.000642715	0.0023646	0.00272538	-0.155271	0.00655555	-2.72	0.311465	1.90534e-07	5.2172	49	4	Reprod	13
GW	S1_10538299_PC_K54_ID1hap2	2	5.15615	PC_K54_ID1	21999342	1834406	S1_10538299	S1_21703045	S1_1780412	-1.32857	28	40	1	1	4.34023	0.206527	7.98696e-05	10622557	0.000185485	0.0018066	0.00270655	-1.3675	0.128473	-1.52046	4.44198	2.38925e-06	4.72396	49	4	Reprod	18
CUPR	S1_22641936_PC_K02_ID1hap2	2	12.1738	PC_K02_ID1	29408502	13181077	S1_22641936	S1_29153101	S1_12990921	0.389148	41	46	33	1	0.209569	0.0112801	0.188004	23017102	0.00106991	2.48684e-05	0.00529593	0.439068	0.00207708	3.08087	0.0696298	0.638591	0.469703	76	3	Reprod	12
GE	S1_22641936_PC_K02_ID1hap2	2	12.1738	PC_K02_ID1	29408502	13181077	S1_22641936	S1_29153101	S1_12990921	0.778296	41	46	33	1	0.419139	0.0112801	0.188004	23017102	0.00106991	2.48684e-05	0.00529593	0.878136	0.00207708	3.08087	0.13926	0.638591	0.469703	76	3	Reprod	14
TGWP	S1_22641936_PC_K02_ID1hap1	1	4.99826	PC_K02_ID1	27718730	11983928	S1_22641936	S1_27524310	S1_11793062	-21.4737	41	45	30	1	0.224723	7.89842e-06	0.965634	23017102	0.0021526	8.06161e-08	0.00244333	-20.8888	3.77984e-06	-4.62946	0.138759	0.9774	0.0283308	61	18	Reprod	17
CUPR	S1_38876779_PC_M05_ID1hap1	1	7.21641	PC_M05_ID1	52644735	14365510	S1_38876779	S1_52195245	S1_14170021	-0.296878	54	63	34	1	-0.199529	0.00218304	0.0507332	39243792	0.00131146	0.000500911	0.00446293	-0.304062	0.000653328	-3.41097	-0.197655	0.0350852	-2.10804	73	10	Reprod	12
GE	S1_38876779_PC_M05_ID1hap1	1	7.21641	PC_M05_ID1	52644735	14365510	S1_38876779	S1_52195245	S1_14170021	-0.593756	54	63	34	1	-0.399058	0.00218304	0.0507332	39243792	0.00131146	0.000500911	0.00446293	-0.608124	0.000653328	-3.41097	-0.395309	0.0350852	-2.10804	73	10	Reprod	14
ED	S1_45905729_PC_O08_ID2hap2	2	6.68157	PC_O08_ID2	185331673	32435046	S1_45905729	S1_183307348	S1_32160169	0.186597	59	100	49	1	-0.0390286	1.68959e-07	0.340617	46156808	0.00320924	0.000102892	0.00349895	0.185581	1.32672e-09	6.07799	-0.0388664	0.276524	-1.08831	74	19	Reprod	13
GW	S1_45905729_PC_O08_ID2hap2	2	7.82915	PC_O08_ID2	161849498	32159537	S1_45905729	S1_160389180	S1_31848692	3.23046	59	94	48	1	-0.941173	7.63722e-09	0.141581	46156808	0.00311073	0.000403149	0.00315675	2.98313	7.92105e-10	6.16085	-1.2804	0.0219463	-2.29216	74	19	Reprod	18
PLHT	S1_65087541_PC_I50_ID2hap1	1	5.06515	PC_I50_ID2	84666416	65078195	S1_65087541	S1_83011568	S1_64238480	-11.3098	72	77	68	1	21.3693	0.00308119	1.79273e-06	65992338	0.000915806	0.00251952	0.00255811	-9.72838	0.00702953	-2.69674	18.8435	7.91388e-06	4.47298	62	9	Veg/Flo	3
LFLN	S1_65087541_PC_I50_ID2hap1	1	4.27598	PC_I50_ID2	77959497	65078195	S1_65087541	S1_76462889	S1_64238480	-4.82974	72	75	68	1	7.84481	0.00159078	1.12213e-05	65992338	0.00110697	0.00231554	0.00231685	-4.3976	0.00246391	-3.02951	7.42479	1.206e-05	4.38159	62	9	Veg/Flo	4
CUPR	S1_80185819_PC_K55_ID2hap1	1	6.23355	PC_K55_ID2	89267452	65992338	S1_80185819	S1_87442613	S1_65087541	0.140377	76	78	72	1	0.301576	0.137957	0.00247045	81803354	0.000150237	0.00107989	0.00282036	0.102248	0.248366	1.15448	0.283259	0.00197946	3.09521	87	10	Reprod	12
GE	S1_80185819_PC_K55_ID2hap1	1	6.23355	PC_K55_ID2	89267452	65992338	S1_80185819	S1_87442613	S1_65087541	0.280753	76	78	72	1	0.603152	0.137957	0.00247045	81803354	0.000150237	0.00107989	0.00282036	0.204497	0.248366	1.15448	0.566519	0.00197946	3.09521	87	10	Reprod	14
PLHT	S1_111925736_PC_K02_ID1hap2	2	6.87709	PC_K02_ID1	190081908	48957359	S1_111925736	S1_187885107	S1_48553912	-42.5501	85	103	61	1	39.0314	2.42753e-08	5.33524e-07	114468322	0.00499107	0.00390983	0.00500251	-43.7875	3.37076e-10	-6.29556	39.5509	2.67188e-08	5.57208	78	2	Veg/Flo	3
LFLN	S1_111925736_PC_K02_ID1hap2	2	8.62286	PC_K02_ID1	190081908	48957359	S1_111925736	S1_187885107	S1_48553912	-19.0736	85	103	61	1	17.9552	4.31368e-10	8.30284e-09	114468322	0.0054561	0.00452382	0.00545737	-19.4846	1.97283e-11	-6.72584	18.093	9.91354e-10	6.12432	78	2	Veg/Flo	4
LBLN	S1_180816044_PC_L56_ID1hap1	1	11.1207	PC_L56_ID1	215221581	176195777	S1_180816044	S1_212167921	S1_174219748	-141.442	99	116	97	1	162.2	4.72505e-09	4.54193e-10	182805794	0.00584251	0.00649282	0.0084939	-143.156	9.86379e-10	-6.12536	162.486	1.18539e-10	6.45726	86	20	Env Resp	9
CUPR	S1_180816044_PC_L56_ID1hap1	1	6.57811	PC_L56_ID1	219651067	176195777	S1_180816044	S1_216451138	S1_174219748	-0.422852	99	119	97	1	0.10272	1.64152e-07	0.237236	182805794	0.00357045	0.000267245	0.00376817	-0.418071	1.93872e-08	-5.62809	0.122792	0.123692	1.53976	86	20	Reprod	12
GE	S1_180816044_PC_L56_ID1hap1	1	6.57811	PC_L56_ID1	219651067	176195777	S1_180816044	S1_216451138	S1_174219748	-0.845705	99	119	97	1	0.20544	1.64152e-07	0.237236	182805794	0.00357045	0.000267245	0.00376817	-0.836141	1.93872e-08	-5.62809	0.245583	0.123692	1.53976	86	20	Reprod	14
TGPP	S1_180816044_PC_L56_ID1hap1	1	10.0921	PC_L56_ID1	215221581	176195777	S1_180816044	S1_212167921	S1_174219748	-1227.01	99	116	97	1	725.895	1.42701e-11	0.000155157	182805794	0.00621374	0.00201797	0.00621476	-1246.17	1.02675e-12	-7.14882	751.615	4.7073e-05	4.07395	86	20	Reprod	16
LFLN	S1_184964421_PC_L56_ID1hap1	1	6.89447	PC_L56_ID1	219651067	176195777	S1_184964421	S1_216451138	S1_174219748	-6.82631	101	119	97	1	3.83578	2.80896e-08	0.00422022	187115510	0.00382577	0.00123973	0.00393877	-6.58673	1.89359e-08	-5.63203	4.07817	0.00135554	3.20604	85	20	Veg/Flo	4
TGWP	S1_203830471_PC_L56_ID1hap1	1	8.54324	PC_L56_ID1	219651067	176195777	S1_203830471	S1_216451138	S1_174219748	-40.343	111	119	97	1	33.6113	6.41853e-10	6.80984e-07	206646985	0.00378806	0.00265618	0.00388401	-37.9309	8.9657e-10	-6.14125	32.763	2.83714e-07	5.14254	86	20	Reprod	17
PLHT	S1_205832658_PC_L56_ID1hap1	1	26.0658	PC_L56_ID1	215221581	176195777	S1_205832658	S1_212167921	S1_174219748	-30.8416	112	116	97	1	26.1672	4.71923e-24	5.93508e-15	208669170	0.0117446	0.0063745	0.0129125	-28.1301	7.63362e-22	-9.65734	23.074	1.30813e-12	7.11477	84	20	Veg/Flo	3
PROL	S1_207390614_PC_L56_ID1hap1	1	17.4445	PC_L56_ID1	211803632	176195777	S1_207390614	S1_208827599	S1_174219748	-4.25604	113	114	97	1	3.61964	4.31693e-17	4.30521e-11	210207328	0.0116029	0.00625222	0.0125343	-4.25236	2.2368e-18	-8.78411	3.40868	1.25731e-10	6.44809	84	20	Env Resp	7
LBNN	S1_207390614_PC_L56_ID1hap1	1	7.42551	PC_L56_ID1	219651067	176195777	S1_207390614	S1_216451138	S1_174219748	-0.603982	113	119	97	1	0.396399	1.1042e-08	0.000543688	210207328	0.00649002	0.0024017	0.0066903	-0.606608	3.74291e-09	-5.90753	0.400618	0.00032969	3.5937	84	20	Env Resp	8
LBIL	S1_207390614_PC_L56_ID1hap1	1	11.9969	PC_L56_ID1	215221581	176195777	S1_207390614	S1_212167921	S1_174219748	-40.6531	113	116	97	1	58.949	1.58517e-07	2.69156e-12	210207328	0.00502494	0.00719872	0.00854819	-42.5639	8.30008e-09	-5.77386	55.4292	5.53599e-12	6.9108	84	20	Env Resp	10
GW	S1_221576198_PC_I06_ID1hap2	2	5.45199	PC_I06_ID1	248530357	195404705	S1_221576198	S1_244827145	S1_193049195	-1.97191	123	138	106	1	-0.219223	0.00472384	0.762922	224852200	0.000729217	1.10439e-05	0.0023403	-1.84036	0.00239463	-3.03821	-0.221827	0.726148	-0.350278	127	9	Reprod	18
ED	S1_221739480_PC_I06_ID1hap2	2	5.20409	PC_I06_ID1	248530357	219651067	S1_221739480	S1_244827145	S1_216451138	-0.115879	124	138	119	1	-0.0228846	0.0132119	0.636252	225026587	0.000640198	5.51521e-07	0.00196774	-0.112033	0.00666181	-2.71466	-0.00338791	0.936497	-0.0796783	128	9	Reprod	13
LBIL	S1_257875899_PC_L08_ID1hap1	1	7.53684	PC_L08_ID1	265278682	248461770	S1_257875899	S1_260684895	S1_244759137	-21.7751	149	151	136	1	51.8013	0.0113145	8.80119e-09	262483242	0.000440943	0.000941725	0.000950943	-14.5961	0.087269	-1.71038	24.0511	0.0124724	2.49955	83	14	Env Resp	10
TGPP	S1_260684895_PC_L08_ID1hap1	1	4.5156	PC_L08_ID1	288412354	255863392	S1_260684895	S1_283310989	S1_251711070	-389.457	151	172	144	1	-346.536	0.0227906	0.0521211	265278682	0.000739763	0.000361939	0.00247386	-404.72	0.0136786	-2.46663	-295.375	0.0845387	-1.72534	84	15	Reprod	16
TGWP	S1_260684895_PC_L08_ID1hap1	1	5.3886	PC_L08_ID1	281176676	255863392	S1_260684895	S1_276254970	S1_251711070	-16.5671	151	162	144	1	-5.46165	0.00120909	0.305099	265278682	0.00103091	8.48954e-05	0.00231247	-15.3916	0.0013669	-3.20375	-4.60365	0.357956	-0.919371	84	15	Reprod	17
CUPR	S1_265441656_PC_J13_ID1hap1	1	5.62122	PC_J13_ID1	282392288	252680413	S1_265441656	S1_277375928	S1_248750866	-0.394159	153	163	142	1	0.00864423	7.12745e-05	0.934688	270240879	0.00176241	1.34922e-05	0.00261094	-0.359703	7.80486e-05	-3.95415	0.0334801	0.729381	0.345972	74	9	Reprod	12
GE	S1_265441656_PC_J13_ID1hap1	1	5.62122	PC_J13_ID1	282392288	252680413	S1_265441656	S1_277375928	S1_248750866	-0.788318	153	163	142	1	0.0172885	7.12745e-05	0.934688	270240879	0.00176241	1.34922e-05	0.00261094	-0.719406	7.80486e-05	-3.95415	0.0669602	0.729381	0.345972	74	9	Reprod	14
ED	S1_267327419_PC_N57_ID2hap1	1	15.9668	PC_N57_ID2	281176676	270240879	S1_267327419	S1_276254970	S1_265441656	0.417933	154	162	153	1	-0.167849	2.70615e-14	0.00303174	272124079	0.00136675	0.000111991	0.00189194	0.211138	7.418e-05	3.96646	-0.0569824	0.256272	-1.1354	85	7	Reprod	13
GW	S1_267327419_PC_N57_ID2hap1	1	13.2578	PC_N57_ID2	281176676	270240879	S1_267327419	S1_276254970	S1_265441656	5.85966	154	162	153	1	-2.15563	1.13475e-11	0.0153928	272124079	0.00163734	4.87421e-09	0.00367099	4.23975	4.09796e-08	5.49685	-1.14164	0.145116	-1.45728	85	7	Reprod	18
TGPP	S1_272839586_PC_K54_ID1hap1	1	4.44572	PC_K54_ID1	284752823	272124079	S1_272839586	S1_279622707	S1_267327419	-909.284	158	166	154	1	145.325	0.000408907	0.593154	277648349	0.00165672	6.83116e-05	0.00248578	-910.579	0.000225912	-3.69132	195.618	0.453563	0.749557	47	5	Reprod	16
TGWP	S1_272839586_PC_K54_ID1hap1	1	6.06155	PC_K54_ID1	283422480	272124079	S1_272839586	S1_278373239	S1_267327419	-33.6469	158	164	154	1	11.1579	4.79929e-06	0.152717	277648349	0.00230003	0.000287187	0.00287323	-33.0361	1.76684e-06	-4.78537	12.3943	0.0909222	1.69095	47	5	Reprod	17
CUPR	S1_280345464_PC_M59_ID1hap1	1	4.40082	PC_M59_ID1	300980115	263450580	S1_280345464	S1_295476193	S1_258808940	0.344788	167	193	150	1	0.0023723	0.0002219	0.98165	285472504	0.00171473	5.49494e-07	0.00243914	0.333401	9.75511e-05	3.90029	-0.00659858	0.94434	-0.0698201	61	11	Reprod	12
GE	S1_280345464_PC_M59_ID1hap1	1	4.40082	PC_M59_ID1	300980115	263450580	S1_280345464	S1_295476193	S1_258808940	0.689576	167	193	150	1	0.00474459	0.0002219	0.98165	285472504	0.00171473	5.49494e-07	0.00243914	0.666803	9.75511e-05	3.90029	-0.0131972	0.94434	-0.0698201	61	11	Reprod	14
DTA	S1_281952874_PC_N57_ID2hap1	1	5.25872	PC_N57_ID2	291348922	284241235	S1_281952874	S1_286182460	S1_279184557	6.82882	171	176	165	1	-5.97811	1.40476e-06	4.89582e-05	287065957	0.00256563	0.00151748	0.00256946	6.37971	1.49513e-06	4.81881	-5.15184	0.000213279	-3.70599	86	8	Veg/Flo	1
DTS	S1_281952874_PC_N57_ID2hap1	1	4.55319	PC_N57_ID2	291348922	284241235	S1_281952874	S1_286182460	S1_279184557	5.4283	171	176	165	1	-4.28908	5.83868e-06	0.000608059	287065957	0.00195183	0.00100162	0.00195197	5.00307	5.58073e-06	4.54742	-3.75525	0.00113243	-3.25758	86	8	Veg/Flo	2
PLHT	S1_287111302_PC_N07_ID1hap2	2	4.25265	PC_N07_ID1	295995680	258953647	S1_287111302	S1_290520670	S1_253386818	-21.8256	178	183	147	1	18.7338	1.16591e-05	0.000240514	292296288	0.00251486	0.00211498	0.00254866	-20.3076	8.06792e-06	-4.46884	19.0629	4.24127e-05	4.09818	117	5	Veg/Flo	3
EILN	S1_288199178_PC_N07_ID1hap2	2	11.9854	PC_N07_ID1	295995680	289182096	S1_288199178	S1_290520670	S1_284062221	0.799303	180	183	173	1	-0.734967	1.82286e-13	3.47382e-11	293436573	0.00364602	0.00265167	0.0036753	0.607088	3.8873e-09	5.90122	-0.529982	5.03738e-07	-5.0326	112	4	Reprod	15
EL	S2_3772404_PC_N10_ID2hap1	1	5.97364	PC_N10_ID2	5784722	2990328	S2_3772404	S2_5836576	S2_2988017	-2.00337	14	21	10	2	6.38848	0.0633014	2.30505e-07	3794924	0.000647551	0.00346115	0.00346155	-2.38684	0.0155115	-2.42118	6.31704	2.30996e-08	5.59759	47	9	Reprod	11
CUPR	S2_3772404_PC_N10_ID2hap1	1	5.35747	PC_N10_ID2	5784722	3246201	S2_3772404	S2_5836576	S2_3230572	-0.222132	14	21	12	2	0.581409	0.0313054	8.48358e-07	3794924	0.000863153	0.00287341	0.00291286	-0.262666	0.00567803	-2.76722	0.547264	4.62805e-07	5.04892	47	9	Reprod	12
GE	S2_3772404_PC_N10_ID2hap1	1	5.35747	PC_N10_ID2	5784722	3246201	S2_3772404	S2_5836576	S2_3230572	-0.444264	14	21	12	2	1.16282	0.0313054	8.48358e-07	3794924	0.000863153	0.00287341	0.00291286	-0.525333	0.00567803	-2.76722	1.09453	4.62805e-07	5.04892	47	9	Reprod	14
CUPR	S2_11628764_PC_I06_ID1hap2	2	6.49655	PC_I06_ID1	54452144	4821774	S2_11628764	S2_52432669	S2_4847903	-0.298574	35	67	18	2	-0.00473143	0.00404057	0.964642	11916291	0.000766222	1.51267e-05	0.00340778	-0.252882	0.00915995	-2.60721	-0.0368836	0.714137	-0.36633	147	7	Reprod	12
GE	S2_11628764_PC_I06_ID1hap2	2	6.49655	PC_I06_ID1	54452144	4821774	S2_11628764	S2_52432669	S2_4847903	-0.597148	35	67	18	2	-0.00946286	0.00404057	0.964642	11916291	0.000766222	1.51267e-05	0.00340778	-0.505763	0.00915995	-2.60721	-0.0737671	0.714137	-0.36633	147	7	Reprod	14
ED	S2_13298791_PC_I06_ID1hap2	2	4.5458	PC_I06_ID1	30305481	9180971	S2_13298791	S2_28895387	S2_9006182	-0.093512	38	55	27	2	-0.0318904	0.0749767	0.553686	13590891	8.32489e-05	0.000134253	0.00159403	-0.0450558	0.327676	-0.978922	-0.058902	0.213886	-1.24314	145	7	Reprod	13
PLHT	S2_14003210_PC_L06_ID2hap2	2	6.00419	PC_L06_ID2	43966373	9440949	S2_14003210	S2_42097724	S2_9277748	22.3338	40	63	28	2	-6.41454	4.53603e-06	0.21322	14305719	0.00186123	0.000150405	0.00235092	17.3447	0.00012256	3.84449	-5.14493	0.274511	-1.09287	55	6	Veg/Flo	3
LFLN	S2_14003210_PC_L06_ID2hap2	2	6.79703	PC_L06_ID2	46059325	9440949	S2_14003210	S2_44202186	S2_9277748	10.8065	40	64	28	2	-7.90381	2.93767e-08	0.000124171	14305719	0.00361513	0.00228446	0.00371654	10.2517	4.6277e-08	5.47479	-8.63813	1.37954e-05	-4.35208	55	6	Veg/Flo	4
CUPR	S2_45196512_PC_N13_ID1hap2	2	4.97757	PC_N13_ID1	190123711	25323228	S2_45196512	S2_184537777	S2_24036765	0.744661	65	92	52	2	-0.635096	2.17514e-06	4.66562e-05	47109616	0.00294747	0.0021133	0.00297227	0.735977	3.29955e-07	5.11357	-0.618662	1.52577e-05	-4.32992	124	3	Reprod	12
GE	S2_45196512_PC_N13_ID1hap2	2	4.97757	PC_N13_ID1	190123711	25323228	S2_45196512	S2_184537777	S2_24036765	1.48932	65	92	52	2	-1.27019	2.17514e-06	4.66562e-05	47109616	0.00294747	0.0021133	0.00297227	1.47195	3.29955e-07	5.11357	-1.23732	1.52577e-05	-4.32992	124	3	Reprod	14
EL	S2_144802108_PC_I55_ID2hap1	1	6.60955	PC_I55_ID2	192377976	35038420	S2_144802108	S2_186790718	S2_33506509	3.42895	80	94	58	2	0.563352	1.84931e-05	0.553009	149354868	0.00220432	2.9605e-05	0.00273092	3.27097	8.13308e-06	4.46713	-0.457929	0.604699	-0.517694	78	15	Reprod	11
CUPR	S2_144802108_PC_I55_ID2hap2	2	8.63208	PC_I55_ID2	172835089	35038420	S2_144802108	S2_168006374	S2_33506509	-0.430021	80	85	58	2	0.146008	4.09785e-10	0.0602685	149354868	0.00476363	0.000546151	0.00476819	-0.410203	8.90396e-11	-6.50083	0.157392	0.0277765	2.20118	89	26	Reprod	12
GE	S2_144802108_PC_I55_ID2hap2	2	8.63208	PC_I55_ID2	172835089	35038420	S2_144802108	S2_168006374	S2_33506509	-0.860042	80	85	58	2	0.292017	4.09785e-10	0.0602685	149354868	0.00476363	0.000546151	0.00476819	-0.820407	8.90396e-11	-6.50083	0.314785	0.0277765	2.20118	89	26	Reprod	14
CUPR	S2_183403574_PC_N58_ID2hap1	1	5.17098	PC_N58_ID2	221919947	172835089	S2_183403574	S2_215092117	S2_168006374	-0.65659	91	121	85	2	0.439737	1.77609e-05	0.00533617	188907627	0.00247197	0.00106739	0.0030894	-0.656232	2.91524e-06	-4.68296	0.445081	0.00210255	3.07723	93	3	Reprod	12
GE	S2_183403574_PC_N58_ID2hap1	1	5.17098	PC_N58_ID2	221919947	172835089	S2_183403574	S2_215092117	S2_168006374	-1.31318	91	121	85	2	0.879474	1.77609e-05	0.00533617	188907627	0.00247197	0.00106739	0.0030894	-1.31246	2.91524e-06	-4.68296	0.890163	0.00210255	3.07723	93	3	Reprod	14
LBNN	S2_208539148_PC_N03_ID2hap1	1	5.83206	PC_N03_ID2	220439724	195823400	S2_208539148	S2_213662006	S2_190086865	1.35769	112	119	98	2	-1.70053	9.63608e-05	1.42472e-06	215373817	0.00298366	0.00463456	0.00532329	1.35456	6.29367e-05	4.00551	-1.70939	6.20921e-07	-4.99214	57	1	Env Resp	8
LBLN	S2_209131864_PC_N03_ID2hap1	1	4.58381	PC_N03_ID2	234050505	195823400	S2_209131864	S2_227041277	S2_190086865	271.956	113	137	98	2	-343.958	0.000620562	2.02565e-05	215978542	0.00193126	0.00307989	0.00359211	270.098	0.000433275	3.5217	-346.285	8.91553e-06	-4.44733	54	1	Env Resp	9
PLHT	S3_1852341_PC_L12_ID2hap1	1	4.84261	PC_L12_ID2	2465188	476283	S3_1852341	S3_3214753	S3_1261966	-14.0316	2	9	0	3	8.84297	1.57072e-05	0.0208255	1171645	0.00217254	0.00054979	0.00247086	-12.551	3.33703e-05	-4.15358	7.37097	0.0367243	2.08947	55	24	Veg/Flo	3
LFWD	S3_1852341_PC_L12_ID2hap1	1	5.43672	PC_L12_ID2	2197917	476283	S3_1852341	S3_2952715	S3_1261966	-0.622333	2	8	0	3	0.336582	2.66266e-06	0.0312041	1171645	0.00298848	0.00071379	0.00340471	-0.607873	8.54543e-07	-4.92965	0.350691	0.0160282	2.40922	55	24	Veg/Flo	5
CUPR	S3_15057578_PC_N07_ID1hap2	2	4.43664	PC_N07_ID1	161006634	6136255	S3_15057578	S3_159377891	S3_6969254	-0.33288	32	67	19	3	0.0950857	0.000263247	0.316705	14339332	0.00133972	9.93889e-05	0.00202663	-0.288553	0.000571224	-3.44751	0.081826	0.347781	0.939006	120	10	Reprod	12
GE	S3_15057578_PC_N07_ID1hap2	2	4.43664	PC_N07_ID1	161006634	6136255	S3_15057578	S3_159377891	S3_6969254	-0.665759	32	67	19	3	0.190171	0.000263247	0.316705	14339332	0.00133972	9.93889e-05	0.00202663	-0.577106	0.000571224	-3.44751	0.163652	0.347781	0.939006	120	10	Reprod	14
EL	S3_16562945_PC_I06_ID1hap1	1	4.91012	PC_I06_ID1	25852377	11446002	S3_16562945	S3_26354452	S3_12135255	-2.67148	33	42	28	3	-0.116085	0.00134491	0.893463	15909798	0.00104742	4.90835e-06	0.00238355	-2.36476	0.0020881	-3.0793	-0.167477	0.833058	-0.210794	135	14	Reprod	11
CUPR	S3_16562945_PC_I06_ID1hap1	1	6.36865	PC_I06_ID1	21878581	11446002	S3_16562945	S3_22388557	S3_12135255	-0.256358	33	39	28	3	-0.0590673	0.00127762	0.475618	15909798	0.00128706	5.77187e-06	0.0029699	-0.252513	0.000733806	-3.37908	-0.0176883	0.82099	-0.226286	135	14	Reprod	12
GE	S3_16562945_PC_I06_ID1hap1	1	6.36865	PC_I06_ID1	21878581	11446002	S3_16562945	S3_22388557	S3_12135255	-0.512716	33	39	28	3	-0.118135	0.00127762	0.475618	15909798	0.00128706	5.77187e-06	0.0029699	-0.505026	0.000733806	-3.37908	-0.0353766	0.82099	-0.226286	135	14	Reprod	14
ED	S3_17579453_PC_I06_ID1hap2	2	4.732	PC_I06_ID1	21321886	10549012	S3_17579453	S3_21856762	S3_11221419	0.143342	34	38	27	3	-0.0243216	0.0119701	0.674076	16934209	0.000321391	5.5451e-07	0.00159089	0.0945392	0.054495	1.92343	0.00395547	0.936326	0.0798939	163	5	Reprod	13
DTS	S3_20307811_PC_N07_ID2hap1	1	18.2314	PC_N07_ID2	21878581	8108621	S3_20307811	S3_22388557	S3_8881648	9.37853	37	39	22	3	-6.83396	3.22123e-19	8.60386e-10	19725264	0.00949552	0.00467047	0.00984013	9.59619	2.03393e-23	10.0301	-7.18311	2.31962e-12	-7.03436	68	11	Veg/Flo	2
DTA	S3_21856762_PC_N07_ID2hap1	1	11.9356	PC_N07_ID2	122363234	8108621	S3_21856762	S3_122067315	S3_8881648	9.48472	38	57	22	3	-7.13499	2.68618e-13	1.89832e-07	21321886	0.00713682	0.00372093	0.00723726	9.72568	1.18588e-15	8.03703	-7.42439	6.9847e-09	-5.80322	67	11	Veg/Flo	1
PLHT	S3_122067315_PC_L12_ID1hap2	2	8.40074	PC_L12_ID1	146547272	27958125	S3_122067315	S3_145438476	S3_28338674	-19.2661	57	62	43	3	6.93263	3.34289e-09	0.0515515	122363234	0.00407978	0.000327966	0.004619	-17.1519	1.34049e-08	-5.69189	5.34206	0.106643	1.61381	101	14	Veg/Flo	3
LFLN	S3_122067315_PC_L12_ID1hap2	2	5.63731	PC_L12_ID1	150586892	22538952	S3_122067315	S3_149313609	S3_23077298	-6.51757	57	63	40	3	3.16498	5.99171e-07	0.0266862	122363234	0.00215616	0.00017695	0.00244241	-5.35874	2.4052e-05	-4.22811	1.69283	0.225869	1.21124	101	14	Veg/Flo	4
DTA	S3_152498239_PC_I52_ID1hap2	2	8.11906	PC_I52_ID1	167226750	40617061	S3_152498239	S3_164589168	S3_41006189	7.26448	64	70	46	3	-2.28266	2.51668e-07	0.121973	153905921	0.00336009	0.000327806	0.00456823	7.23902	3.70455e-08	5.51466	-2.37248	0.0850581	-1.72247	78	6	Veg/Flo	1
PLHT	S3_152498239_PC_I52_ID1hap2	2	5.43065	PC_I52_ID1	177643229	19725264	S3_152498239	S3_175133614	S3_20307811	18.6144	64	77	37	3	-4.09432	7.57659e-05	0.405925	153905921	0.00219754	7.8522e-05	0.00355216	17.9141	3.00739e-05	4.1774	-3.54998	0.429777	-0.789648	78	6	Veg/Flo	3
LFLN	S3_152498239_PC_I52_ID1hap2	2	4.66345	PC_I52_ID1	201336856	27958125	S3_152498239	S3_198233972	S3_28338674	6.99125	64	92	43	3	-1.66107	0.000205328	0.399406	153905921	0.00176705	8.00836e-05	0.00275882	6.82898	0.000131208	3.82763	-1.52275	0.415203	-0.814849	78	6	Veg/Flo	4
DTA	S3_157207688_PC_N03_ID2hap2	2	15.6731	PC_N03_ID2	171280391	25852377	S3_157207688	S3_168698213	S3_26354452	10.7254	66	73	42	3	-1.86654	3.71694e-06	0.425844	158792436	0.00225567	9.74472e-05	0.00690439	9.85039	6.40332e-06	4.51836	-2.07202	0.347716	-0.939134	63	3	Veg/Flo	1
DTS	S3_157207688_PC_N03_ID2hap2	2	13.9415	PC_N03_ID2	175726710	25852377	S3_157207688	S3_173292942	S3_26354452	7.57482	66	76	42	3	0.120874	1.5964e-05	0.946147	158792436	0.00145574	1.57412e-05	0.00478722	7.08986	8.7282e-05	3.92723	-0.743066	0.683016	-0.408379	63	3	Veg/Flo	2
PLHT	S3_162079869_PC_N57_ID2hap2	2	8.04166	PC_N57_ID2	175726710	142141671	S3_162079869	S3_173292942	S3_141270242	-22.7353	69	76	61	3	18.9568	2.69264e-09	4.74481e-06	163737608	0.00472527	0.00176841	0.00473072	-21.6105	9.84432e-10	-6.12564	14.5762	0.000181035	3.7474	78	10	Veg/Flo	3
TILN	S3_162079869_PC_N57_ID2hap1	1	4.10332	PC_N57_ID2	169649820	127742289	S3_162079869	S3_167009203	S3_127231470	0.961358	69	72	58	3	1.0684	0.058305	0.0546099	163737608	0.000719412	0.000343865	0.00265651	1.09511	0.0270433	2.21164	0.83028	0.126326	1.52904	73	12	Env Resp	6
TGWP	S3_164589168_PC_N57_ID2hap2	2	5.63092	PC_N57_ID2	169649820	150586892	S3_164589168	S3_167009203	S3_149313609	-29.0912	70	72	63	3	15.8932	7.54242e-07	0.0109642	167226750	0.00177704	0.000606509	0.00180113	-23.8389	2.65178e-05	-4.20627	14.6725	0.0140377	2.45735	80	11	Reprod	17
LFWD	S3_168698213_PC_I52_ID1hap1	1	6.22924	PC_I52_ID1	193368435	110170316	S3_168698213	S3_190458363	S3_89037968	-0.605694	73	88	55	3	-0.172627	5.5423e-05	0.287433	171280391	0.00226711	0.000106677	0.00373304	-0.600356	1.79598e-05	-4.29365	-0.140797	0.351709	-0.93138	68	13	Veg/Flo	5
TGPP	S3_168698213_PC_I52_ID1hap2	2	4.36828	PC_I52_ID1	204724772	142141671	S3_168698213	S3_201538103	S3_141270242	500.366	73	95	61	3	259.732	0.019145	0.257357	171280391	0.000628737	0.000208428	0.00253594	465.761	0.0230155	2.27401	287.99	0.190507	1.30929	73	7	Reprod	16
EL	S3_168698213_PC_N03_ID2hap2	2	4.16355	PC_N03_ID2	207623726	9987831	S3_168698213	S3_204359086	S3_10685778	4.0462	73	97	26	3	-0.218988	0.0149271	0.897866	171280391	0.000632578	8.40276e-07	0.00233039	3.61376	0.016753	2.39303	0.13558	0.930503	0.0872171	62	3	Reprod	11
CUPR	S3_168698213_PC_N03_ID2hap2	2	6.20916	PC_N03_ID2	199166024	9619686	S3_168698213	S3_196208781	S3_10325549	0.609788	73	91	25	3	-0.208957	0.000123223	0.199674	171280391	0.00163921	0.000282727	0.00261303	0.555965	0.000138975	3.81344	-0.238522	0.113328	-1.58374	62	3	Reprod	12
GE	S3_168698213_PC_N03_ID2hap2	2	6.20916	PC_N03_ID2	199166024	9619686	S3_168698213	S3_196208781	S3_10325549	1.21958	73	91	25	3	-0.417914	0.000123223	0.199674	171280391	0.00163921	0.000282727	0.00261303	1.11193	0.000138975	3.81344	-0.477045	0.113328	-1.58374	62	3	Reprod	14
DTS	S3_172146356_PC_O59_ID2hap1	1	8.34381	PC_O59_ID2	177643229	142141671	S3_172146356	S3_175133614	S3_141270242	5.24913	75	77	61	3	-0.795816	3.41581e-09	0.447579	174556766	0.00394076	9.17887e-05	0.00420566	5.23123	1.15232e-10	6.46151	-0.943619	0.32412	-0.98614	62	16	Veg/Flo	2
PLHT	S3_172146356_PC_O59_ID2hap2	2	4.63876	PC_O59_ID2	184526231	94334900	S3_172146356	S3_181616653	S3_108434521	-12.8599	75	83	54	3	-1.92441	0.000225118	0.619871	174556766	0.00211368	2.97207e-06	0.00293541	-13.0214	4.2644e-05	-4.09692	-0.544254	0.877911	-0.153627	75	13	Veg/Flo	3
TGWP	S3_173292942_PC_O59_ID2hap1	1	4.11731	PC_O59_ID2	221511324	122363234	S3_173292942	S3_217900978	S3_122067315	15.8219	76	116	57	3	7.46792	0.000728601	0.170568	175726710	0.00114562	0.000159576	0.00180426	14.8432	0.000738846	3.3773	6.44939	0.207572	1.26047	63	16	Reprod	17
DTA	S3_178184353_PC_L14_ID1hap2	2	5.68666	PC_L14_ID1	202741574	161006634	S3_178184353	S3_199649461	S3_159377891	4.70616	80	93	67	3	-1.77357	4.75874e-07	0.107806	181002762	0.00348718	0.000328863	0.00354947	4.88646	2.05704e-08	5.61798	-1.7734	0.0845572	-1.72524	80	17	Veg/Flo	1
DTS	S3_178184353_PC_L14_ID1hap2	2	5.8466	PC_L14_ID1	212350520	179142531	S3_178184353	S3_208783386	S3_176564762	4.25861	80	103	79	3	-1.92515	2.72762e-07	0.0494772	181002762	0.00293451	0.000501205	0.00293475	4.24768	2.61452e-08	5.57586	-2.07996	0.0212495	-2.30437	80	17	Veg/Flo	2
EL	S3_183312852_PC_L12_ID1hap1	1	5.46712	PC_L12_ID1	205703007	174556766	S3_183312852	S3_202491403	S3_172146356	4.00899	84	96	75	3	-2.73198	8.09462e-07	0.00238642	186249145	0.00228976	0.000208709	0.00240977	3.37749	5.43921e-06	4.55288	-1.17657	0.169342	-1.37455	92	16	Reprod	11
CUPR	S3_183312852_PC_L12_ID1hap2	2	7.77294	PC_L12_ID1	197859644	179142531	S3_183312852	S3_194888891	S3_176564762	-0.282245	84	90	79	3	-0.179286	0.00034548	0.0367683	186249145	0.00182067	0.000240034	0.00396125	-0.293989	5.94575e-05	-4.01897	-0.116941	0.144564	-1.45927	102	15	Reprod	12
GE	S3_183312852_PC_L12_ID1hap2	2	7.77294	PC_L12_ID1	197859644	179142531	S3_183312852	S3_194888891	S3_176564762	-0.56449	84	90	79	3	-0.358572	0.00034548	0.0367683	186249145	0.00182067	0.000240034	0.00396125	-0.587977	5.94575e-05	-4.01897	-0.233883	0.144564	-1.45927	102	15	Reprod	14
ED	S3_186384960_PC_N11_ID1hap2	2	5.98604	PC_N11_ID1	212350520	168523492	S3_186384960	S3_208783386	S3_165903196	-0.153621	86	103	71	3	-0.112717	0.0517955	0.146455	189316686	0.000168107	0.000141222	0.00185072	-0.107218	0.164276	-1.39108	-0.0976173	0.202381	-1.275	53	3	Reprod	13
GW	S3_186384960_PC_N11_ID1hap1	1	5.1669	PC_N11_ID1	212350520	168523492	S3_186384960	S3_208783386	S3_165903196	3.70969	86	103	71	3	NA	1.3265e-06	NA	189316686	NA	NA	0.00209995	3.33931	3.84617e-07	5.08459	NA	NA	NA	44	NA	Reprod	18
ED	S4_155830398_PC_J07_ID2hap2	2	6.2418	PC_J07_ID2	174616169	32651447	S4_155830398	S4_171547160	S4_31070793	-0.253733	59	69	40	4	0.26805	5.10328e-07	2.74802e-06	159348015	0.00151231	0.0012607	0.00163949	-0.191119	3.07674e-05	-4.17234	0.195387	0.000141282	3.80948	53	7	Reprod	13
GW	S4_155830398_PC_J07_ID2hap2	2	5.37788	PC_J07_ID2	174616169	26003767	S4_155830398	S4_171547160	S4_24422540	-3.57272	59	69	37	4	4.07482	6.68564e-06	5.67388e-06	159348015	0.00115569	0.00150949	0.00159961	-2.62175	0.000259511	-3.65584	3.33041	3.14604e-05	4.16722	53	7	Reprod	18
EL	S4_156970527_PC_J07_ID2hap2	2	5.04241	PC_J07_ID2	182771189	27944824	S4_156970527	S4_179820693	S4_26428512	-5.33526	60	82	38	4	4.41906	1.88602e-06	0.000481959	160476049	0.00298448	0.00166172	0.00300961	-5.27978	2.11023e-07	-5.19787	4.45933	0.000106663	3.87855	53	7	Reprod	11
CUPR	S4_158705473_PC_J07_ID2hap2	2	8.31911	PC_J07_ID2	182771189	32651447	S4_158705473	S4_179820693	S4_31070793	-0.655836	61	82	40	4	0.519627	8.56539e-10	1.72766e-05	162158494	0.00473915	0.00274602	0.00480613	-0.637119	9.93905e-11	-6.4841	0.54918	8.28904e-07	4.93573	53	7	Reprod	12
GE	S4_158705473_PC_J07_ID2hap2	2	8.31911	PC_J07_ID2	182771189	32651447	S4_158705473	S4_179820693	S4_31070793	-1.31167	61	82	40	4	1.03925	8.56539e-10	1.72766e-05	162158494	0.00473915	0.00274602	0.00480613	-1.27424	9.93905e-11	-6.4841	1.09836	8.28904e-07	4.93573	53	7	Reprod	14
TGWP	S4_158705473_PC_J07_ID2hap2	2	4.89716	PC_J07_ID2	176631685	32651447	S4_158705473	S4_173598275	S4_31070793	-30.3138	61	73	40	4	24.4061	2.5274e-06	0.000686004	162158494	0.00246627	0.0014308	0.00247934	-29.9408	7.51406e-07	-4.95529	25.5398	0.00016272	3.77431	53	7	Reprod	17
ED	S4_161556636_PC_L14_ID1hap1	1	6.21919	PC_L14_ID1	185374150	43542617	S4_161556636	S4_182009756	S4_41789228	-0.177028	63	86	44	4	-0.0152567	5.28828e-07	0.710814	164602685	0.0035364	5.1458e-06	0.00371637	-0.193488	1.96194e-10	-6.38028	0.00859098	0.807723	0.24338	80	24	Reprod	13
GW	S4_161556636_PC_L14_ID1hap1	1	4.09052	PC_L14_ID1	185374150	38603920	S4_161556636	S4_182009756	S4_36931539	-1.88478	63	86	43	4	-1.06853	0.000569744	0.0938523	164602685	0.00160919	8.03382e-05	0.00196358	-2.08261	9.06293e-06	-4.44393	-0.532842	0.334298	-0.965604	80	24	Reprod	18
ED	S4_179820693_PC_N57_ID2hap2	2	32.4492	PC_N57_ID2	187162616	180085817	S4_179820693	S4_183770032	S4_177057304	0.532841	82	87	77	4	-0.299018	3.03922e-33	4.34971e-10	182771189	0.0153185	0.00501112	0.0154165	0.521052	1.94096e-39	13.2791	-0.336755	3.78267e-14	-7.59497	74	13	Reprod	13
GW	S4_180672448_PC_N57_ID2hap2	2	41.8034	PC_N57_ID2	187162616	181857443	S4_180672448	S4_183770032	S4_178887805	9.58256	83	87	81	4	-5.99033	6.12686e-43	1.34822e-15	183598681	NA	NA	3.45938e-05	1.81552	0.0552478	1.91746	NA	NA	NA	73	13	Reprod	18
LBNN	S4_186483710_PC_J04_ID1hap1	1	4.25809	PC_J04_ID1	220843737	180085817	S4_186483710	S4_216763527	S4_177057304	0.475402	90	100	77	4	-0.153194	0.000119503	0.229799	189874489	0.00280906	0.000258719	0.00369605	0.466127	0.000103225	3.88654	-0.146172	0.238265	-1.1795	110	10	Env Resp	8
TGWP	S4_186483710_PC_J04_ID1hap2	2	4.24796	PC_J04_ID1	220843737	181857443	S4_186483710	S4_216763527	S4_178887805	-0.079491	90	100	81	4	-17.1728	0.988243	0.00261679	189874489	1.24619e-06	0.00109564	0.00242438	-0.563951	0.911314	-0.111388	-17.6801	0.000965431	-3.30281	97	10	Reprod	17
EL	S5_24439701_PC_I08_ID1hap1	1	6.31495	PC_I08_ID1	172839240	20028384	S5_24439701	S5_168890795	S5_19528965	-4.53521	51	78	47	5	-0.70171	3.87072e-06	0.500682	25007274	0.00182878	0.000214433	0.00306675	-3.69417	4.81002e-05	-4.06885	-1.36433	0.163609	-1.39328	54	15	Reprod	11
CUPR	S5_24439701_PC_I08_ID1hap1	1	4.42671	PC_I08_ID1	172839240	6094998	S5_24439701	S5_168890795	S5_5904157	-0.347727	51	78	22	5	-0.0865075	0.000213835	0.38562	25007274	0.00173149	0.000120768	0.00260909	-0.337212	9.01934e-05	-3.9193	-0.0946325	0.300688	-1.03508	54	15	Reprod	12
GE	S5_24439701_PC_I08_ID1hap1	1	4.42671	PC_I08_ID1	172839240	6094998	S5_24439701	S5_168890795	S5_5904157	-0.695453	51	78	22	5	-0.173015	0.000213835	0.38562	25007274	0.00173149	0.000120768	0.00260909	-0.674425	9.01934e-05	-3.9193	-0.189265	0.300688	-1.03508	54	15	Reprod	14
GW	S5_25883063_PC_J07_ID2hap1	1	5.35183	PC_J07_ID2	191818671	14490548	S5_25883063	S5_195188841	S5_14109861	2.70916	52	91	41	5	0.0926366	5.12257e-05	0.901709	26501280	0.0014952	9.57741e-07	0.00225689	2.57036	1.61566e-05	4.31738	-0.167465	0.802028	-0.250739	59	12	Reprod	18
ED	S5_28117414_PC_J07_ID2hap2	2	5.63271	PC_J07_ID2	86329215	10058891	S5_28117414	S5_84104987	S5_9713028	-0.20225	53	67	33	5	0.0578991	1.77669e-06	0.228595	28807517	0.00258933	0.000206388	0.00284666	-0.201824	5.05464e-08	-5.45949	0.0648663	0.123308	1.54135	58	12	Reprod	13
ED	S5_52761677_PC_L56_ID1hap1	1	4.45259	PC_L56_ID1	94991702	12940161	S5_52761677	S5_92603969	S5_12561010	-0.172393	60	69	39	5	0.0804613	1.14172e-05	0.0658268	54421293	0.00170961	0.000153328	0.00196891	-0.15115	9.39542e-06	-4.43616	0.050833	0.184078	1.32852	88	19	Reprod	13
LFWD	S5_61428803_PC_L56_ID1hap1	1	4.96461	PC_L56_ID1	145805888	38498688	S5_61428803	S5_142474431	S5_37256357	-0.535144	62	71	56	5	0.0888289	8.67681e-06	0.51868	63234250	0.000892564	0.000229528	0.00208699	-0.308739	0.0070855	-2.69408	-0.181299	0.171953	-1.36618	86	20	Veg/Flo	5
CUPR	S5_167588052_PC_O08_ID2hap2	2	4.52043	PC_O08_ID2	189154152	54421293	S5_167588052	S5_184494852	S5_52761677	0.280335	77	89	60	5	0.0599668	0.000901784	0.542754	171548531	0.00146668	2.8367e-05	0.00257485	0.279085	0.000313093	3.60717	0.0453344	0.615935	0.501656	69	12	Reprod	12
GE	S5_167588052_PC_O08_ID2hap2	2	4.52043	PC_O08_ID2	189154152	54421293	S5_167588052	S5_184494852	S5_52761677	0.56067	77	89	60	5	0.119934	0.000901784	0.542754	171548531	0.00146668	2.8367e-05	0.00257485	0.55817	0.000313093	3.60717	0.0906689	0.615935	0.501656	69	12	Reprod	14
CUPR	S5_172475475_PC_J07_ID2hap1	1	4.16555	PC_J07_ID2	179763652	155594968	S5_172475475	S5_175736574	S5_151886722	0.206161	80	82	73	5	-0.453064	0.0278456	1.43153e-05	176582534	0.000404857	0.00212322	0.00215807	0.163755	0.0581362	1.89518	-0.420207	1.45729e-05	-4.34007	58	11	Reprod	12
GE	S5_172475475_PC_J07_ID2hap1	1	4.16555	PC_J07_ID2	179763652	155594968	S5_172475475	S5_175736574	S5_151886722	0.412321	80	82	73	5	-0.906128	0.0278456	1.43153e-05	176582534	0.000404857	0.00212322	0.00215807	0.32751	0.0581362	1.89518	-0.840414	1.45729e-05	-4.34007	58	11	Reprod	14
CUPR	S6_156419168_PC_J04_ID1hap2	2	4.26177	PC_J04_ID1	164330545	157804404	S6_156419168	S6_160164392	S6_153623515	0.362963	77	85	72	6	-0.124992	8.66282e-05	0.197518	160560934	0.00186341	0.000181573	0.00237414	0.344255	4.8714e-05	4.06587	-0.11283	0.204444	-1.26918	99	10	Reprod	12
GE	S6_156419168_PC_J04_ID1hap2	2	4.26177	PC_J04_ID1	164330545	157804404	S6_156419168	S6_160164392	S6_153623515	0.725926	77	85	72	6	-0.249984	8.66282e-05	0.197518	160560934	0.00186341	0.000181573	0.00237414	0.68851	4.8714e-05	4.06587	-0.22566	0.204444	-1.26918	99	10	Reprod	14
CUPR	S6_164646269_PC_O51_ID2hap1	1	4.59799	PC_O51_ID2	172155075	166769061	S6_164646269	S6_167926822	S6_162563530	-0.307821	99	110	91	6	0.322052	7.40007e-05	0.00191257	168768104	0.00211737	0.00137305	0.00286482	-0.308166	1.49731e-05	-4.33408	0.331649	0.000487642	3.49014	53	17	Reprod	12
GE	S6_164646269_PC_O51_ID2hap1	1	4.59799	PC_O51_ID2	172155075	166769061	S6_164646269	S6_167926822	S6_162563530	-0.615641	99	110	91	6	0.644105	7.40007e-05	0.00191257	168768104	0.00211737	0.00137305	0.00286482	-0.616332	1.49731e-05	-4.33408	0.663297	0.000487642	3.49014	53	17	Reprod	14
GW	S6_164646269_PC_O51_ID2hap2	2	8.73664	PC_O51_ID2	169681844	166890709	S6_164646269	S6_165530260	S6_162685062	3.62928	99	103	92	6	2.52128	9.43469e-09	0.000943459	168768104	0.00372894	0.00128228	0.00450232	3.66739	1.41273e-11	6.77558	2.62607	6.0983e-05	4.01309	58	25	Reprod	18
DTS	S6_164797355_PC_O51_ID2hap1	1	8.6546	PC_O51_ID2	172155075	168447788	S6_164797355	S6_167926822	S6_164308928	3.48089	100	110	97	6	-6.39013	4.81676e-05	2.69594e-08	168942993	0.00205654	0.00351525	0.00459323	3.64783	3.13724e-06	4.66781	-6.39333	1.13505e-09	-6.10271	53	18	Veg/Flo	2
PLHT	S6_164797355_PC_O51_ID2hap1	1	7.39779	PC_O51_ID2	172155075	168045336	S6_164797355	S6_167926822	S6_163875945	-12.9777	100	110	96	6	19.9333	2.80208e-05	1.81321e-06	168942993	0.0027023	0.00349256	0.00515248	-13.0963	3.72212e-06	-4.63239	20.066	1.45997e-07	5.26635	53	18	Veg/Flo	3
PROL	S6_164797355_PC_O51_ID2hap2	2	7.37577	PC_O51_ID2	170399120	168447788	S6_164797355	S6_166242538	S6_164308928	2.34531	100	107	97	6	1.83825	7.86551e-07	0.00258084	168942993	0.00412043	0.00151123	0.0056202	2.35595	1.73188e-07	5.23462	1.83592	0.00153428	3.17015	58	26	Env Resp	7
EL	S6_164797355_PC_O51_ID2hap1	1	4.27905	PC_O51_ID2	172155075	166769061	S6_164797355	S6_167926822	S6_162563530	-3.35583	100	110	91	6	2.3437	2.95155e-05	0.029762	168942993	0.00229357	0.000744292	0.00262996	-3.3206	5.34265e-06	-4.55666	2.54075	0.00947093	2.59575	53	18	Reprod	11
ED	S6_164797355_PC_O51_ID2hap1	1	9.15281	PC_O51_ID2	169248748	168045336	S6_164797355	S6_165104844	S6_163875945	-0.274135	100	101	96	6	0.227141	6.01748e-10	3.62789e-05	168942993	0.00471181	0.00208262	0.0050916	-0.27776	2.13163e-13	-7.36466	0.229597	1.01406e-06	4.89625	53	18	Reprod	13
TGWP	S6_164797355_PC_O51_ID2hap2	2	5.15825	PC_O51_ID2	170399120	167838200	S6_164797355	S6_166242538	S6_163633881	20.63	100	107	95	6	17.7455	2.36037e-05	0.00242283	168942993	0.00195635	0.000957978	0.00251529	20.2042	1.04384e-05	4.41339	16.9677	0.0020262	3.08835	58	26	Reprod	17
TGPP	S6_165530260_PC_O51_ID2hap1	1	9.98914	PC_O51_ID2	170963928	168447788	S6_165530260	S6_166812237	S6_164308928	-846.211	103	108	97	6	914.353	2.03542e-08	6.12435e-06	169681844	0.00416693	0.00268946	0.00598379	-848.132	5.15831e-09	-5.85417	913.802	2.64348e-06	4.70317	54	19	Reprod	16
DTA	S6_165586391_PC_O51_ID2hap1	1	5.95475	PC_O51_ID2	172155075	168447788	S6_165586391	S6_167926822	S6_164308928	4.17233	104	110	97	6	-5.84476	8.09327e-05	1.37407e-05	169737973	0.00191884	0.00253548	0.00349616	4.10856	3.14329e-05	4.16738	-5.99597	1.72179e-06	-4.79041	55	19	Veg/Flo	1
LFLN	S6_165586391_PC_O51_ID2hap1	1	6.3806	PC_O51_ID2	172155075	168045336	S6_165586391	S6_167926822	S6_163875945	-5.4693	104	110	96	6	6.19326	1.11095e-05	0.000192994	169737973	0.00267216	0.00148447	0.00362627	-5.56021	2.59324e-06	-4.70692	5.55909	0.000455626	3.50826	55	19	Veg/Flo	4
LFWD	S6_165586391_PC_O51_ID2hap1	1	19.2057	PC_O51_ID2	170112404	168942993	S6_165586391	S6_165945090	S6_164797355	-1.06502	104	105	100	6	0.940963	1.11022e-16	3.81251e-08	169737973	0.00979094	0.00426057	0.0123899	-1.07039	6.581e-19	-8.92284	0.942807	4.25373e-09	5.88606	55	19	Veg/Flo	5
TILN	S6_165586391_PC_O51_ID2hap1	1	5.72439	PC_O51_ID2	172155075	168768104	S6_165586391	S6_167926822	S6_164646269	-1.67361	104	110	99	6	2.18122	9.2231e-05	0.000135095	169737973	0.00236397	0.00224085	0.00400207	-1.67188	6.19716e-05	-4.0091	2.17323	9.63243e-05	3.90331	55	19	Env Resp	6
LBNN	S6_165586391_PC_O51_ID2hap1	1	9.30979	PC_O51_ID2	170963928	168447788	S6_165586391	S6_166812237	S6_164308928	-0.635897	104	108	97	6	0.367289	4.99536e-10	0.00681207	169737973	0.00763892	0.00149197	0.00836012	-0.636812	1.6221e-10	-6.40913	0.374323	0.00464082	2.83246	55	19	Env Resp	8
CUPR	S7_9050208_PC_I50_ID2hap2	2	4.92042	PC_I50_ID2	9878872	6679697	S7_9050208	S7_9593783	S7_6303214	-0.544481	19	21	15	7	0.668727	5.7369e-05	2.44499e-06	9356747	0.00127641	0.00172781	0.00173655	-0.426411	0.00077197	-3.36507	0.518302	9.17569e-05	3.91514	81	4	Reprod	12
GE	S7_9050208_PC_I50_ID2hap2	2	4.92042	PC_I50_ID2	9878872	6679697	S7_9050208	S7_9593783	S7_6303214	-1.08896	19	21	15	7	1.33745	5.7369e-05	2.44499e-06	9356747	0.00127641	0.00172781	0.00173655	-0.852822	0.00077197	-3.36507	1.0366	9.17569e-05	3.91514	81	4	Reprod	14
PROL	S7_17518523_PC_L14_ID1hap1	1	6.2215	PC_L14_ID1	25853499	9356747	S7_17518523	S7_24693980	S7_9050208	2.6393	27	30	19	7	-1.90109	1.50564e-07	0.00119976	18150800	0.00448258	0.00166854	0.00456871	2.59773	5.03429e-08	5.45982	-1.85337	0.000872436	-3.33106	80	14	Env Resp	7
EILN	S7_20195641_PC_L14_ID1hap1	1	4.14811	PC_L14_ID1	128748483	9356747	S7_20195641	S7_124699755	S7_9050208	-0.641844	28	50	19	7	0.557207	1.64276e-05	0.000298308	21092037	0.00244501	0.00182265	0.00245189	-0.650882	1.39547e-06	-4.83251	0.581529	3.07408e-05	4.17239	79	15	Reprod	15
EL	S7_136176371_PC_L14_ID1hap1	1	9.60224	PC_L14_ID1	167426039	102313742	S7_136176371	S7_161950696	S7_99206435	-8.63829	62	79	41	7	5.07317	9.25198e-10	0.00066487	141824042	0.00393396	0.000694897	0.00553119	-7.77933	2.6019e-09	-5.96768	3.4844	0.0121738	2.50814	82	17	Reprod	11
CUPR	S7_136176371_PC_L14_ID1hap1	1	6.85881	PC_L14_ID1	171254221	127457078	S7_136176371	S7_165680595	S7_123505107	-0.683686	62	86	49	7	0.375874	4.09092e-07	0.00841469	141824042	0.00250248	0.000360779	0.00377257	-0.591877	2.53359e-06	-4.71178	0.239624	0.0736791	1.78904	82	17	Reprod	12
GE	S7_136176371_PC_L14_ID1hap1	1	6.85881	PC_L14_ID1	171254221	127457078	S7_136176371	S7_165680595	S7_123505107	-1.36737	62	86	49	7	0.751748	4.09092e-07	0.00841469	141824042	0.00250248	0.000360779	0.00377257	-1.18375	2.53359e-06	-4.71178	0.479248	0.0736791	1.78904	82	17	Reprod	14
CUPR	S7_144301219_PC_I58_ID2hap1	1	4.23423	PC_I58_ID2	170891046	118587397	S7_144301219	S7_165302721	S7_115182646	-0.363244	67	85	45	7	-0.00562665	0.00224209	0.963328	149226457	0.00103661	7.52904e-07	0.00215348	-0.330171	0.00243955	-3.03254	-0.00917343	0.934867	-0.0817277	72	6	Reprod	12
GE	S7_144301219_PC_I58_ID2hap1	1	4.23423	PC_I58_ID2	170891046	118587397	S7_144301219	S7_165302721	S7_115182646	-0.726487	67	85	45	7	-0.0112533	0.00224209	0.963328	149226457	0.00103661	7.52904e-07	0.00215348	-0.660342	0.00243955	-3.03254	-0.0183469	0.934867	-0.0817277	72	6	Reprod	14
ED	S7_161620354_PC_M59_ID1hap2	2	6.41634	PC_M59_ID1	170388910	160142200	S7_161620354	S7_164832179	S7_154782750	-0.21583	78	84	71	7	0.017988	7.37371e-06	0.719637	167051539	0.0010325	2.81353e-05	0.00222421	-0.151572	0.000571458	-3.44749	-0.0259995	0.569323	-0.569094	73	9	Reprod	13
GW	S7_161620354_PC_M59_ID1hap2	2	4.74592	PC_M59_ID1	171254221	137277282	S7_161620354	S7_165680595	S7_133173736	-2.42249	78	86	59	7	-0.498168	0.00124535	0.526091	167051539	0.00132979	2.54735e-05	0.00253858	-2.58783	5.53442e-05	-4.03601	-0.349248	0.603902	-0.518837	73	9	Reprod	18
PLHT	S8_16770747_PC_L12_ID2hap1	1	4.30648	PC_L12_ID2	24172251	15007208	S8_16770747	S8_23427520	S8_14597186	-14.8436	36	45	31	8	8.53791	1.02226e-05	0.0372266	17318929	0.00205944	0.000733165	0.00211632	-12.847	5.34694e-05	-4.04401	9.20226	0.015868	2.4129	57	14	Veg/Flo	3
PROL	S8_16770747_PC_L12_ID2hap1	1	4.28317	PC_L12_ID2	22390319	8693804	S8_16770747	S8_21699750	S8_8356616	-2.19099	36	43	19	8	0.455182	2.57077e-05	0.469649	17318929	0.00421153	0.00063801	0.00423849	-2.64893	1.26877e-07	-5.29217	1.25399	0.0394764	2.05981	57	14	Env Resp	7
ED	S8_17420840_PC_J04_ID1hap1	1	5.1331	PC_J04_ID1	24172251	2930593	S8_17420840	S8_23427520	S8_2761618	-0.137143	38	45	5	8	-0.018673	0.0304633	0.774868	17971365	0.000512762	6.66527e-06	0.00245855	-0.131111	0.015162	-2.4295	-0.0154073	0.7818	-0.276992	102	4	Reprod	13
GW	S8_17420840_PC_J04_ID1hap1	1	6.8879	PC_J04_ID1	20913913	13619957	S8_17420840	S8_20231174	S8_13268180	-2.35689	38	41	29	8	-0.485387	0.017747	0.635277	17971365	0.000518181	2.58332e-05	0.00297059	-2.14253	0.0118069	-2.51897	-0.470722	0.591005	-0.537421	102	4	Reprod	18
DTS	S8_21699750_PC_I05_ID1hap1	1	5.35997	PC_I05_ID1	155293817	14157933	S8_21699750	S8_150726018	S8_13789719	-5.73815	43	75	30	8	1.7716	3.65795e-06	0.161476	22390319	0.00225971	0.000299858	0.00244209	-5.5377	1.02983e-06	-4.89295	2.06253	0.0747569	1.78239	58	8	Veg/Flo	2
LFWD	S8_24721346_PC_I05_ID1hap1	1	7.37599	PC_I05_ID1	137427781	21501824	S8_24721346	S8_133456140	S8_20820308	-0.901055	46	67	42	8	0.0266938	4.72669e-06	0.89436	25512921	0.00188074	3.99079e-06	0.00328745	-0.772635	9.34326e-05	-3.91071	0.0370274	0.857048	0.180144	58	7	Veg/Flo	5
CUPR	S8_71632012_PC_I50_ID2hap2	2	5.06167	PC_I50_ID2	125544530	21501824	S8_71632012	S8_122427292	S8_20820308	0.267438	52	63	42	8	0.126394	0.0050942	0.244538	72763482	0.00100543	5.28433e-05	0.00235604	0.266501	0.00283709	2.98659	0.0694013	0.493576	0.68469	68	9	Reprod	12
GE	S8_71632012_PC_I50_ID2hap2	2	5.06167	PC_I50_ID2	125544530	21501824	S8_71632012	S8_122427292	S8_20820308	0.534876	52	63	42	8	0.252788	0.0050942	0.244538	72763482	0.00100543	5.28433e-05	0.00235604	0.533003	0.00283709	2.98659	0.138803	0.493576	0.68469	68	9	Reprod	14
DTA	S8_76034284_PC_I11_ID2hap2	2	5.32851	PC_I11_ID2	114048796	13619957	S8_76034284	S8_111346890	S8_13268180	-3.00494	53	60	29	8	-1.40205	0.00951867	0.273431	77436416	0.000779737	0.000163254	0.00292745	-2.86808	0.00792445	-2.65654	-1.45063	0.224222	-1.21556	78	9	Veg/Flo	1
ED	S8_76034284_PC_I11_ID2hap2	2	5.18255	PC_I11_ID2	125544530	3859768	S8_76034284	S8_122427292	S8_3662564	0.0941949	53	63	8	8	0.0785069	0.0359136	0.114063	77436416	0.00127092	5.88965e-07	0.00250929	0.150124	0.000132765	3.82488	-0.00365939	0.934381	-0.0823386	78	9	Reprod	13
DTA	S8_150726018_PC_N03_ID2hap2	2	10.8376	PC_N03_ID2	161008763	149502256	S8_150726018	S8_156200995	S8_145191040	1.93952	75	78	72	8	6.06635	0.318891	0.00227043	155293817	2.42747e-05	0.000754618	0.00311912	0.857693	0.639289	0.468727	4.88235	0.00899646	2.61341	59	4	Veg/Flo	1
DTS	S5_28641193_PC_N03_ID2hap2	2	11.6256	PC_N03_ID2	161008763	149502256	S5_28641193	S8_156200995	S8_145191040	4.96582	76	78	72	8	2.47268	0.000517596	0.0943325	157137107	0.000338766	0.000373583	0.00333626	2.78648	0.0582262	1.8945	2.97396	0.0467125	1.98947	59	5	Veg/Flo	2
CUPR	S8_168284905_PC_I11_ID2hap2	2	4.47611	PC_I11_ID2	177034788	22390319	S8_168284905	S8_171755389	S8_21699750	-0.217573	96	113	43	8	-0.130062	0.00947744	0.168279	173533914	0.00100611	0.000308951	0.00312592	-0.230434	0.00282782	-2.98759	-0.143515	0.097885	-1.65556	73	13	Reprod	12
GE	S8_168284905_PC_I11_ID2hap2	2	4.47611	PC_I11_ID2	177034788	22390319	S8_168284905	S8_171755389	S8_21699750	-0.435146	96	113	43	8	-0.260124	0.00947744	0.168279	173533914	0.00100611	0.000308951	0.00312592	-0.460869	0.00282782	-2.98759	-0.287031	0.097885	-1.65556	73	13	Reprod	14
EL	S8_172702614_PC_K02_ID1hap2	2	6.96156	PC_K02_ID1	179090072	177543951	S8_172702614	S8_173851571	S8_172245390	3.30623	118	123	116	8	1.5609	0.00109994	0.170536	178014378	0.00128108	0.000151905	0.00353233	3.20269	0.00066656	3.40549	1.23979	0.240993	1.17267	60	9	Reprod	11
CUPR	S8_172702614_PC_K02_ID1hap2	2	6.29315	PC_K02_ID1	179174397	177543951	S8_172702614	S8_173935678	S8_172245390	0.104508	118	124	116	8	0.358082	0.280422	0.00101596	178014378	0.000465949	0.000568331	0.00292342	0.182547	0.0420994	2.03315	0.230118	0.0247913	2.24543	60	9	Reprod	12
GE	S8_172702614_PC_K02_ID1hap2	2	6.29315	PC_K02_ID1	179174397	177543951	S8_172702614	S8_173935678	S8_172245390	0.209016	118	124	116	8	0.716165	0.280422	0.00101596	178014378	0.000465949	0.000568331	0.00292342	0.365094	0.0420994	2.03315	0.460235	0.0247913	2.24543	60	9	Reprod	14
CUPR	S8_173935678_PC_L12_ID1hap2	2	4.0893	PC_L12_ID1	179547109	177034788	S8_173935678	S8_174307629	S8_171755389	-0.296233	124	125	113	8	0.0882046	4.04039e-05	0.291685	179174397	0.00224152	0.000117714	0.00248427	-0.295349	8.43216e-06	-4.45934	0.0789157	0.306881	1.02191	88	18	Reprod	12
GE	S8_173935678_PC_L12_ID1hap2	2	4.0893	PC_L12_ID1	179547109	177034788	S8_173935678	S8_174307629	S8_171755389	-0.592467	124	125	113	8	0.176409	4.04039e-05	0.291685	179174397	0.00224152	0.000117714	0.00248427	-0.590697	8.43216e-06	-4.45934	0.157831	0.306881	1.02191	88	18	Reprod	14
EL	S9_17236192_PC_L14_ID1hap1	1	6.16591	PC_L14_ID1	18793160	10546450	S9_17236192	S9_18883159	S9_11156148	-3.694	22	26	12	9	2.32707	6.5639e-07	0.00817878	16983022	0.00222126	0.000765012	0.00256906	-3.08087	7.50906e-06	-4.48426	2.13154	0.00852826	2.63163	77	28	Reprod	11
CUPR	S9_17236192_PC_L14_ID1hap1	1	4.7634	PC_L14_ID1	18793160	10546450	S9_17236192	S9_18883159	S9_11156148	-0.327958	22	26	12	9	0.110495	3.89542e-06	0.18917	16983022	0.00210459	0.000190398	0.00212702	-0.285878	1.58859e-05	-4.32099	0.101399	0.193786	1.29966	77	28	Reprod	12
GE	S9_17236192_PC_L14_ID1hap1	1	4.7634	PC_L14_ID1	18793160	10546450	S9_17236192	S9_18883159	S9_11156148	-0.655915	22	26	12	9	0.220991	3.89542e-06	0.18917	16983022	0.00210459	0.000190398	0.00212702	-0.571756	1.58859e-05	-4.32099	0.202798	0.193786	1.29966	77	28	Reprod	14
LBNN	S9_18322214_PC_N07_ID2hap2	2	5.40458	PC_N07_ID2	122120304	10546450	S9_18322214	S9_120362734	S9_11156148	-0.535639	24	52	12	9	0.562698	6.97098e-06	2.42002e-05	18168944	0.0043671	0.00376939	0.00524499	-0.561124	1.30472e-06	-4.84596	0.588674	6.90667e-06	4.50214	65	13	Env Resp	8
EL	S9_18322214_PC_N07_ID2hap2	2	4.09822	PC_N07_ID2	122120304	10546450	S9_18322214	S9_120362734	S9_11156148	-4.02756	24	52	12	9	2.86348	1.79915e-05	0.00619222	18168944	0.00276071	0.00113975	0.00278767	-4.25885	5.98787e-07	-4.9992	3.05097	0.00132723	3.21215	65	13	Reprod	11
TGWP	S9_18883159_PC_N07_ID2hap2	2	4.16708	PC_N07_ID2	122120304	10546450	S9_18883159	S9_120362734	S9_11156148	-30.5578	26	52	12	9	24.2398	1.42229e-05	0.00134119	18793160	0.00217395	0.00125728	0.0021744	-30.699	3.38515e-06	-4.65236	25.0877	0.000407564	3.53805	64	8	Reprod	17
CUPR	S9_21820242_PC_N10_ID2hap2	2	4.33631	PC_N10_ID2	122120304	18793160	S9_21820242	S9_120362734	S9_18883159	-0.449364	29	52	26	9	0.408751	3.32279e-05	0.000678817	21641863	0.00204725	0.00132896	0.00230594	-0.424209	2.07228e-05	-4.26172	0.381628	0.000601179	3.43364	50	8	Reprod	12
GE	S9_21820242_PC_N10_ID2hap2	2	4.33631	PC_N10_ID2	122120304	18793160	S9_21820242	S9_120362734	S9_18883159	-0.898729	29	52	26	9	0.817502	3.32279e-05	0.000678817	21641863	0.00204725	0.00132896	0.00230594	-0.848418	2.07228e-05	-4.26172	0.763256	0.000601179	3.43364	50	8	Reprod	14
PROL	S9_31091937_PC_I55_ID2hap1	1	4.77803	PC_I55_ID2	117528903	10546450	S9_31091937	S9_114178123	S9_11156148	-1.81045	36	50	12	9	1.31064	1.00791e-05	0.00840962	31235709	0.00360143	0.00130608	0.00401049	-1.89975	1.02489e-06	-4.89386	1.38847	0.00322464	2.94712	74	30	Env Resp	7
TGPP	S9_31091937_PC_I55_ID2hap1	1	9.42003	PC_I55_ID2	78457985	18181811	S9_31091937	S9_75394226	S9_18335081	-807.779	36	42	25	9	645.329	9.24348e-10	4.74215e-05	31235709	0.00514171	0.00242769	0.00594893	-823.705	8.79333e-11	-6.50297	681.414	8.08641e-06	4.46842	74	30	Reprod	16
TGWP	S9_31091937_PC_I55_ID2hap1	1	4.75866	PC_I55_ID2	122120304	16080107	S9_31091937	S9_120362734	S9_16322321	-18.4862	36	52	21	9	13.7808	6.93155e-06	0.00439917	31235709	0.00247069	0.000919468	0.00260094	-19.1333	7.34536e-07	-4.95973	13.74	0.0024965	3.02564	74	30	Reprod	17
PLHT	S9_47606583_PC_N07_ID2hap2	2	5.43654	PC_N07_ID2	122120304	10546450	S9_47606583	S9_120362734	S9_11156148	-17.8548	39	52	12	9	23.7474	4.53032e-05	1.23694e-06	49591590	0.00283776	0.00404474	0.0042258	-18.9465	2.13128e-06	-4.74707	25.3058	1.54522e-08	5.66739	57	8	Veg/Flo	3
LFWD	S9_47606583_PC_N07_ID2hap2	2	6.67405	PC_N07_ID2	122120304	18168944	S9_47606583	S9_120362734	S9_18322214	-0.853314	39	52	24	9	0.979079	7.24276e-07	4.44748e-07	49591590	0.000470752	0.00353277	0.00362388	-0.514749	0.0504667	-1.95653	0.977283	8.76415e-08	5.3598	57	8	Veg/Flo	5
TGPP	S9_47606583_PC_N07_ID2hap2	2	5.06569	PC_N07_ID2	122120304	10546450	S9_47606583	S9_120362734	S9_11156148	-936.576	39	52	12	9	1048.15	1.09851e-05	1.13325e-05	49591590	0.00272474	0.00270293	0.0032245	-966.605	2.27456e-06	-4.73391	1079.31	2.49608e-06	4.71493	57	8	Reprod	16
CUPR	S9_144161301_PC_I50_ID2hap1	1	4.34932	PC_I50_ID2	153518062	135894825	S9_144161301	S9_150350532	S9_133506901	0.40314	70	87	57	9	-0.206293	1.04108e-05	0.038287	146967493	0.00202228	0.000594388	0.00202321	0.359971	2.32682e-05	4.23565	-0.210877	0.0217052	-2.29633	80	11	Reprod	12
GE	S9_144161301_PC_I50_ID2hap1	1	4.34932	PC_I50_ID2	153518062	135894825	S9_144161301	S9_150350532	S9_133506901	0.80628	70	87	57	9	-0.412587	1.04108e-05	0.038287	146967493	0.00202228	0.000594388	0.00202321	0.719942	2.32682e-05	4.23565	-0.421755	0.0217052	-2.29633	80	11	Reprod	14
DTA	S9_147736039_PC_K60_ID1hap1	1	5.1576	PC_K60_ID1	154353228	147446896	S9_147736039	S9_151176393	S9_144636416	-5.64869	80	90	71	9	3.36127	1.42948e-06	0.00655605	150754483	0.002845	0.000859141	0.00286357	-5.53372	4.05542e-07	-5.07439	3.2141	0.00531862	2.78853	75	10	Veg/Flo	1
DTS	S9_147736039_PC_K60_ID1hap1	1	5.20388	PC_K60_ID1	154353228	142337036	S9_147736039	S9_151176393	S9_139750293	-5.1473	80	90	63	9	3.30419	1.215e-06	0.0031566	150754483	0.00256739	0.000887648	0.00257	-5.03669	1.92036e-07	-5.21543	3.13028	0.0021782	3.06665	75	10	Veg/Flo	2
DTS	S9_150984958_PC_N57_ID2hap2	2	5.61819	PC_N57_ID2	155233989	150754483	S9_150984958	S9_152084591	S9_147736039	5.09237	89	97	80	9	-4.04225	9.8913e-07	0.000183025	154172218	0.0013976	0.00142281	0.00195786	5.5063	0.000120817	3.848	-3.88616	0.000104923	-3.88255	84	13	Veg/Flo	2
DTA	S9_151176393_PC_N57_ID2hap2	2	4.29901	PC_N57_ID2	155405945	150754483	S9_151176393	S9_152262382	S9_147736039	4.88127	90	98	80	9	-4.11374	2.3731e-05	0.000666933	154353228	0.00190299	0.0011059	0.00201212	4.49089	3.38874e-05	4.15013	-3.61213	0.00156864	-3.16375	83	13	Veg/Flo	1
ED	S10_3192420_PC_J07_ID2hap2	2	4.54936	PC_J07_ID2	5182768	2430438	S10_3192420	S10_5532731	S10_2839520	-0.202819	10	17	8	10	0.0782896	1.66828e-05	0.123238	2776872	0.00168914	0.00021615	0.00192123	-0.185904	1.06229e-05	-4.40952	0.0709586	0.114784	1.57738	68	9	Reprod	13
GW	S10_3192420_PC_J07_ID2hap2	2	5.61552	PC_J07_ID2	5182768	2430438	S10_3192420	S10_5532731	S10_2839520	-3.43487	10	17	8	10	1.06756	3.3877e-06	0.180422	2776872	0.00177446	0.000326197	0.00194644	-3.14121	4.053e-06	-4.61481	1.32518	0.0672366	1.83057	68	9	Reprod	18
ED	S10_136756601_PC_N57_ID2hap1	1	6.44371	PC_N57_ID2	140760142	127318440	S10_136756601	S10_140051129	S10_126307599	0.16708	61	68	49	10	0.034188	6.46269e-05	0.463946	137973140	0.00195991	3.99623e-05	0.00259952	0.179364	2.10497e-06	4.74981	-0.0293276	0.497656	-0.678242	67	15	Reprod	13
GW	S10_136756601_PC_N57_ID2hap1	1	5.64026	PC_N57_ID2	140760142	128278276	S10_136756601	S10_140051129	S10_127255484	2.58817	61	68	50	10	0.262131	8.0991e-05	0.721511	137973140	0.00112235	3.60416e-05	0.00253947	2.85417	2.42202e-05	4.22673	-0.347432	0.626485	-0.486716	67	15	Reprod	18
